# Supplementary material
Source: Springer Nature journal article supplement (https://www.springermedizin.de/resource/supplementary/12885_2009_2037_MOESM2_ESM.pdf/9460370)

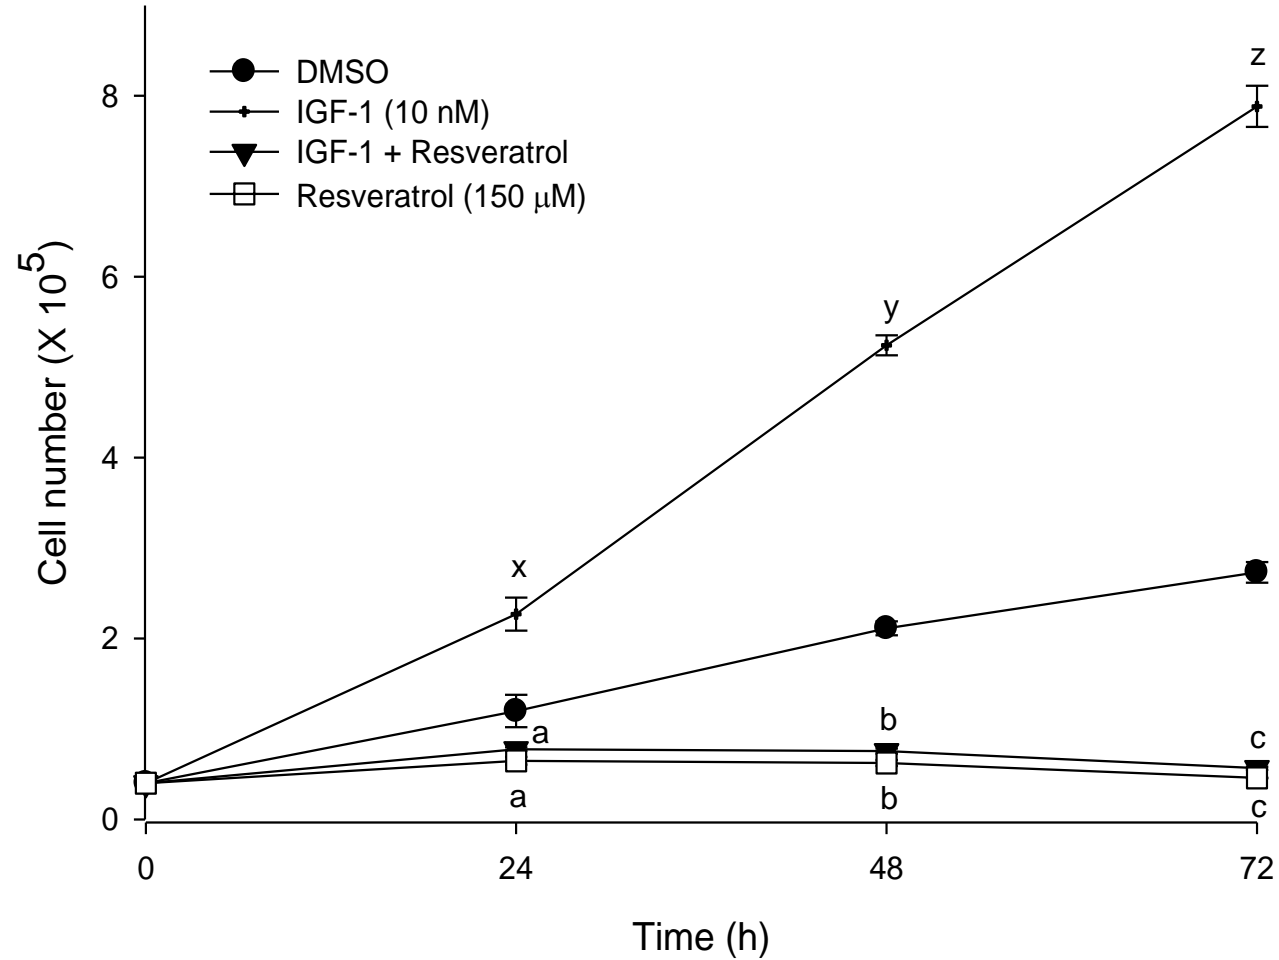

Supplement: MOESM2 [file 9460370]
